# Supplementary material
Source: PubMed Central journal article supplement (PMC5076566)

# Supplementary Data Figure S1

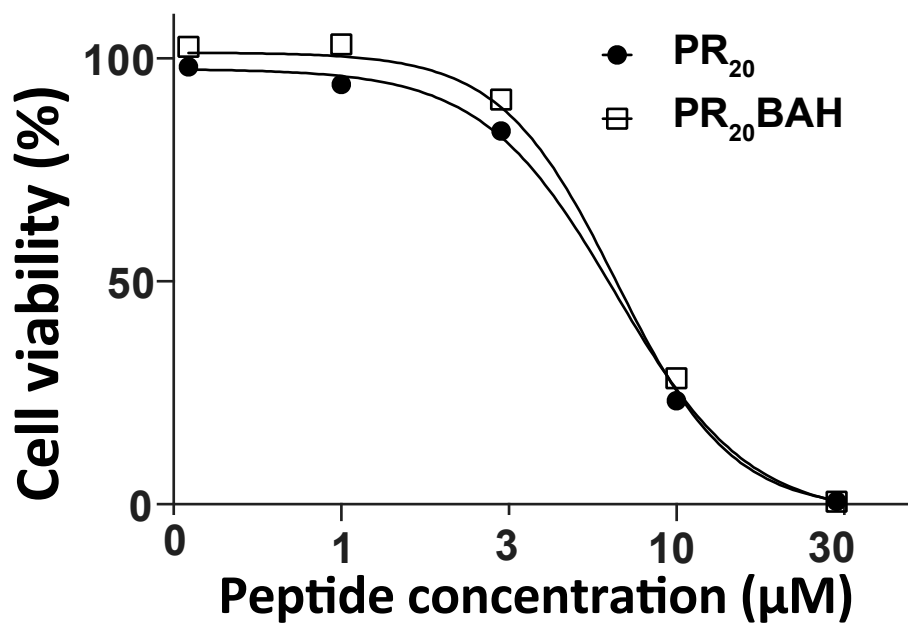

|                                         |        |
|-----------------------------------------|--------|
| IC <sub>50</sub> (PR <sub>20</sub> )    | 6.6 μM |
| IC <sub>50</sub> (PR <sub>20</sub> BAH) | 6.6 μM |

# Supplementary Data

## Figure S2

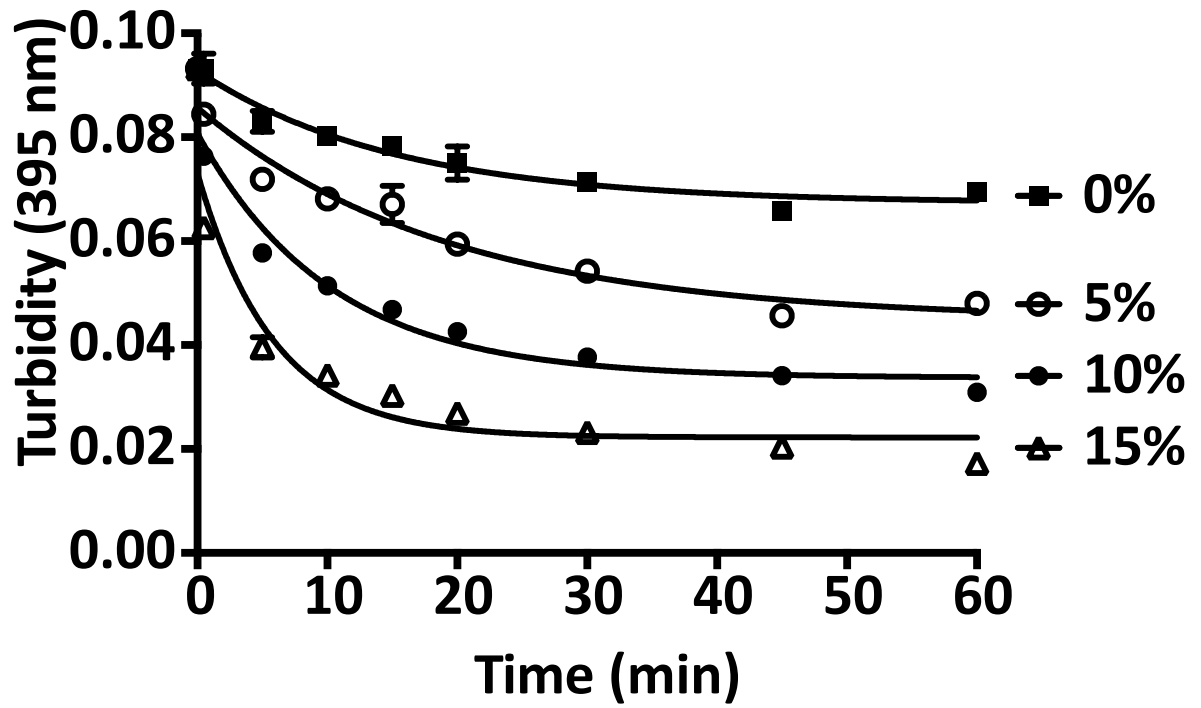

# Supplementary Data

## Figure S3

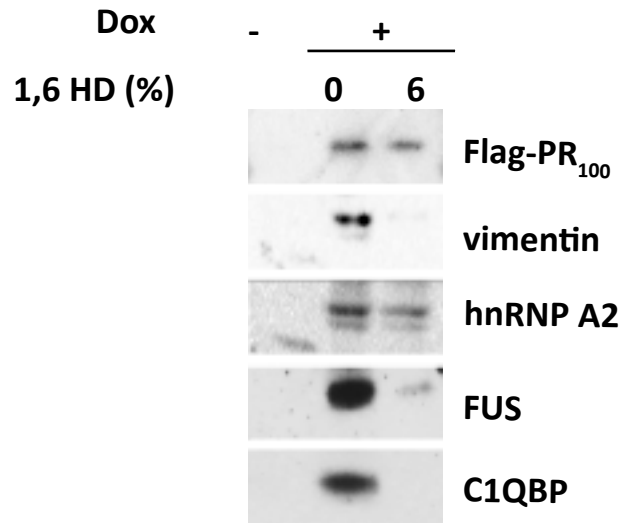

# Supplementary Data

## Figure S4

### A

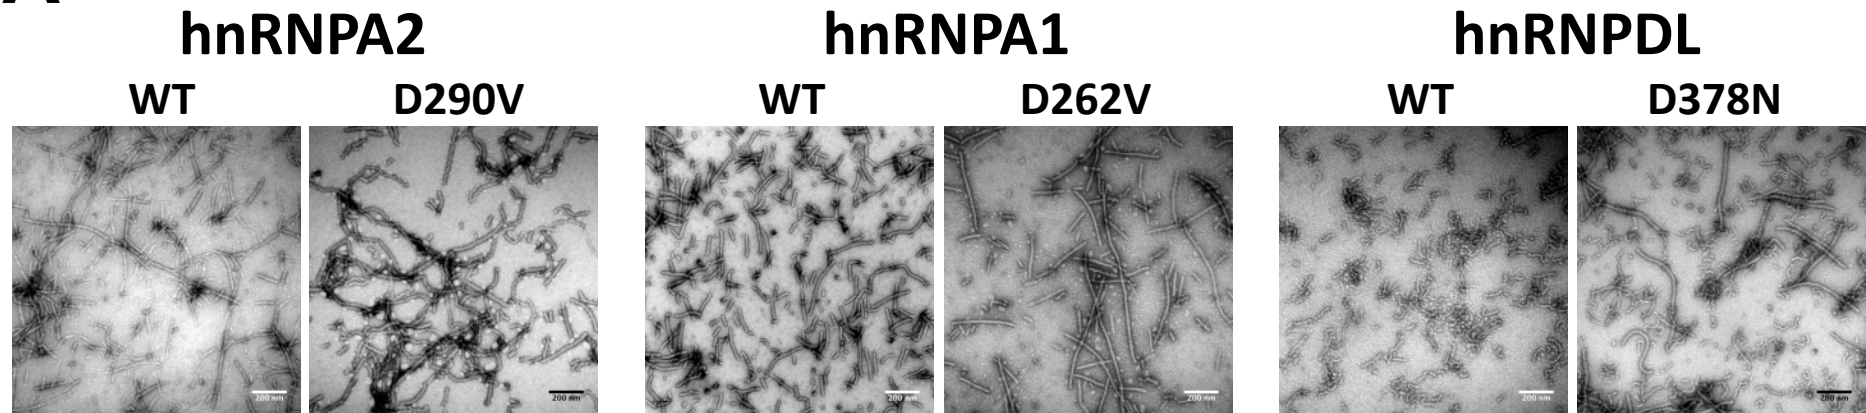

### B

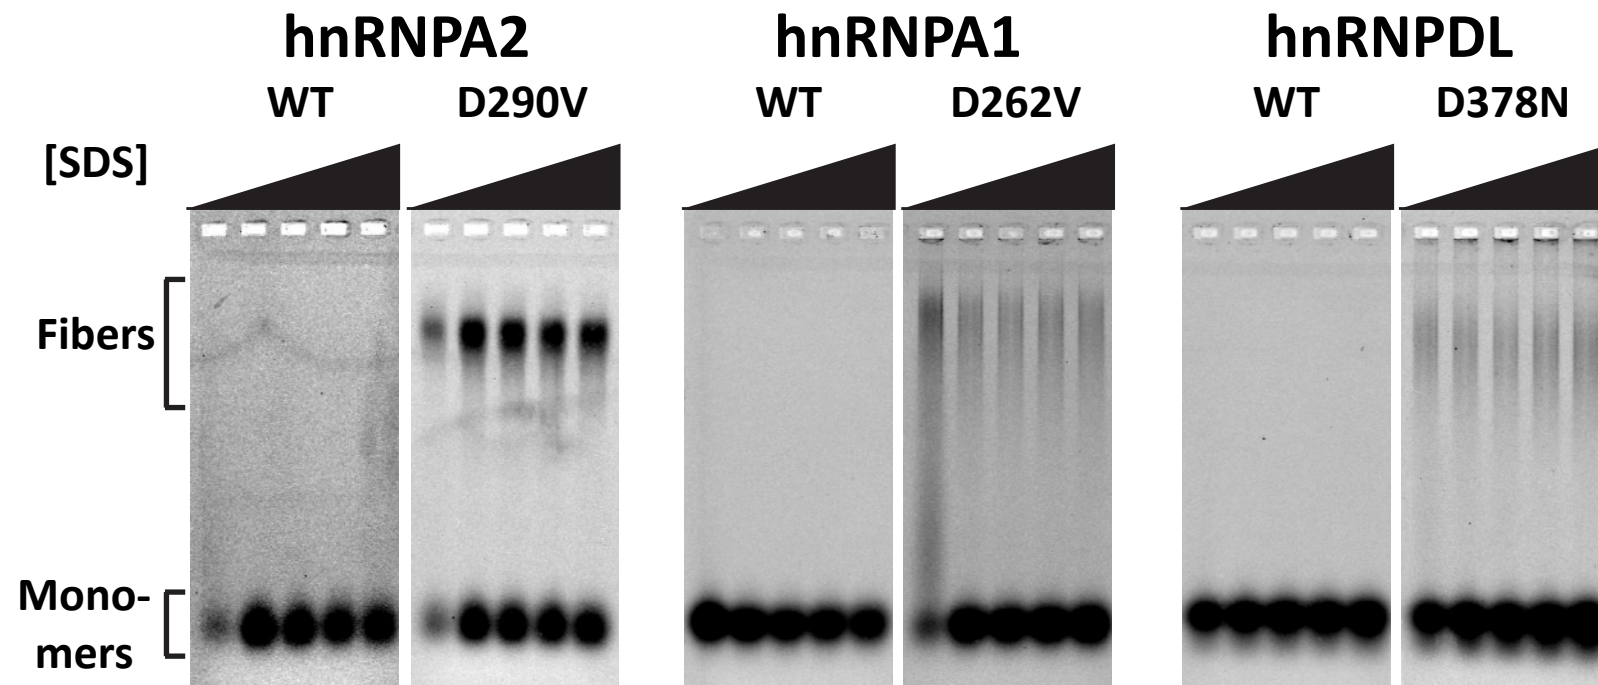

# Supplementary Data, Figure S5

**A**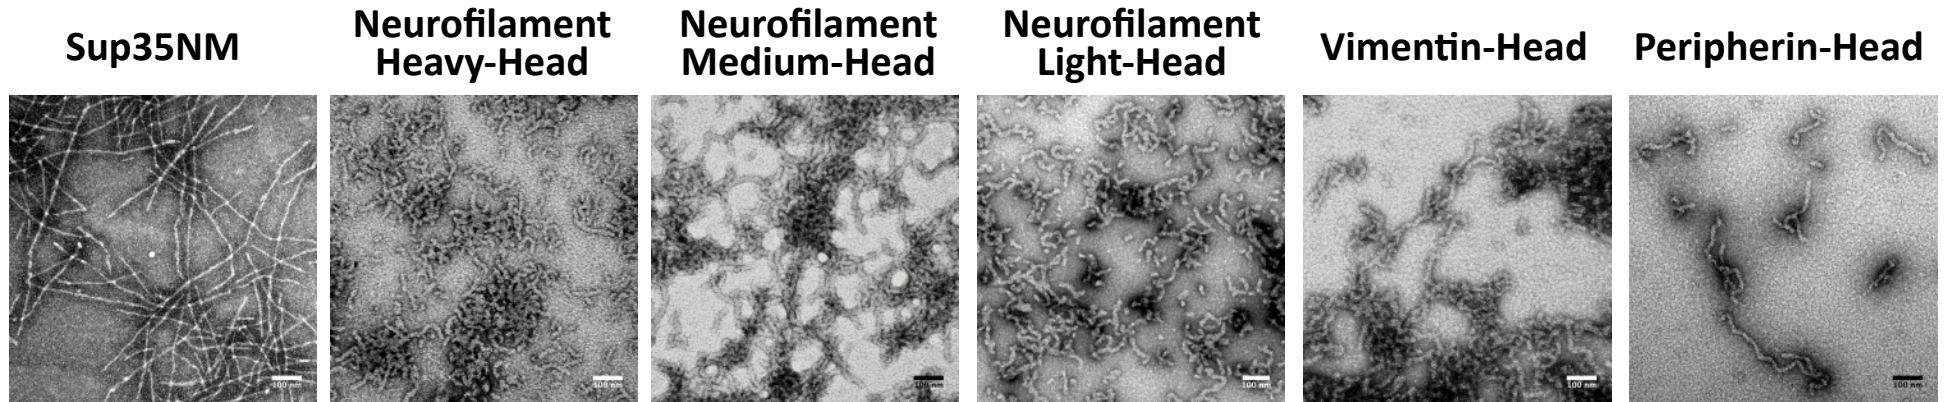**B**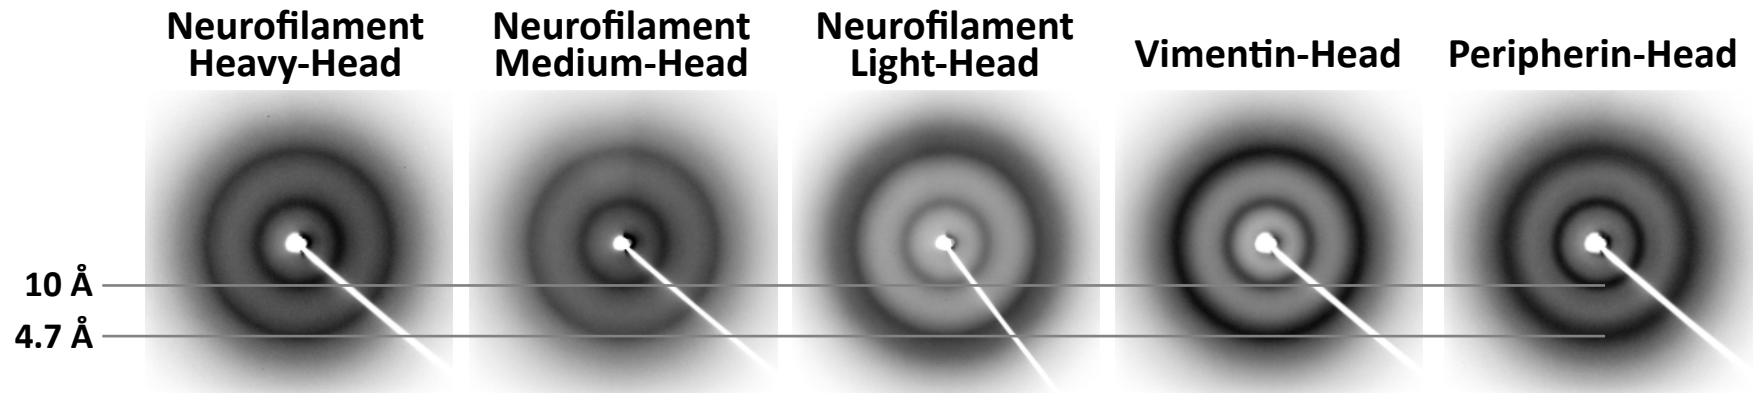**C**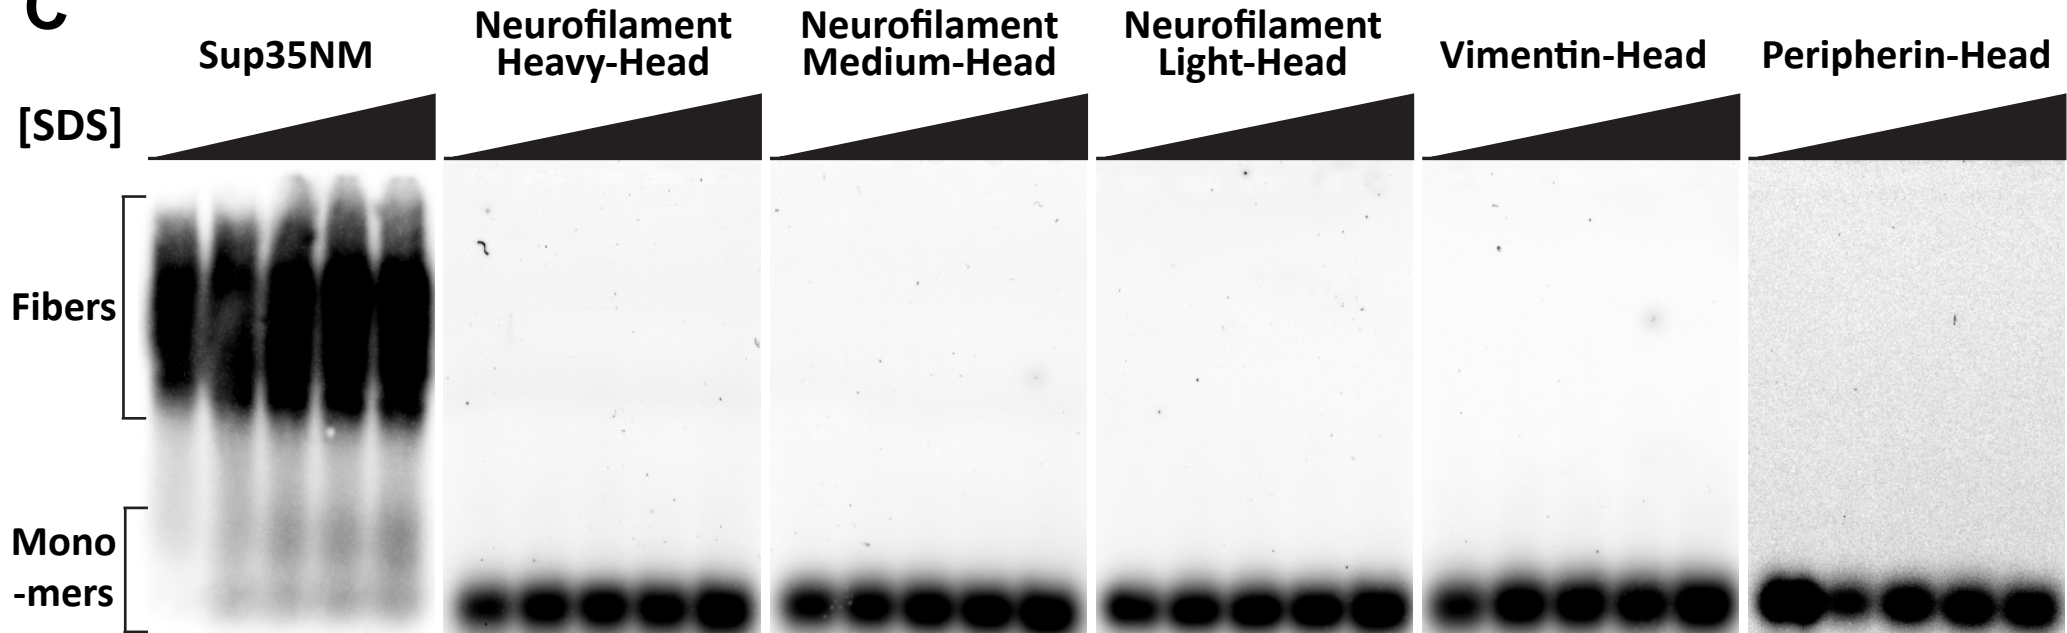

# Supplementary Data

## Figure S6

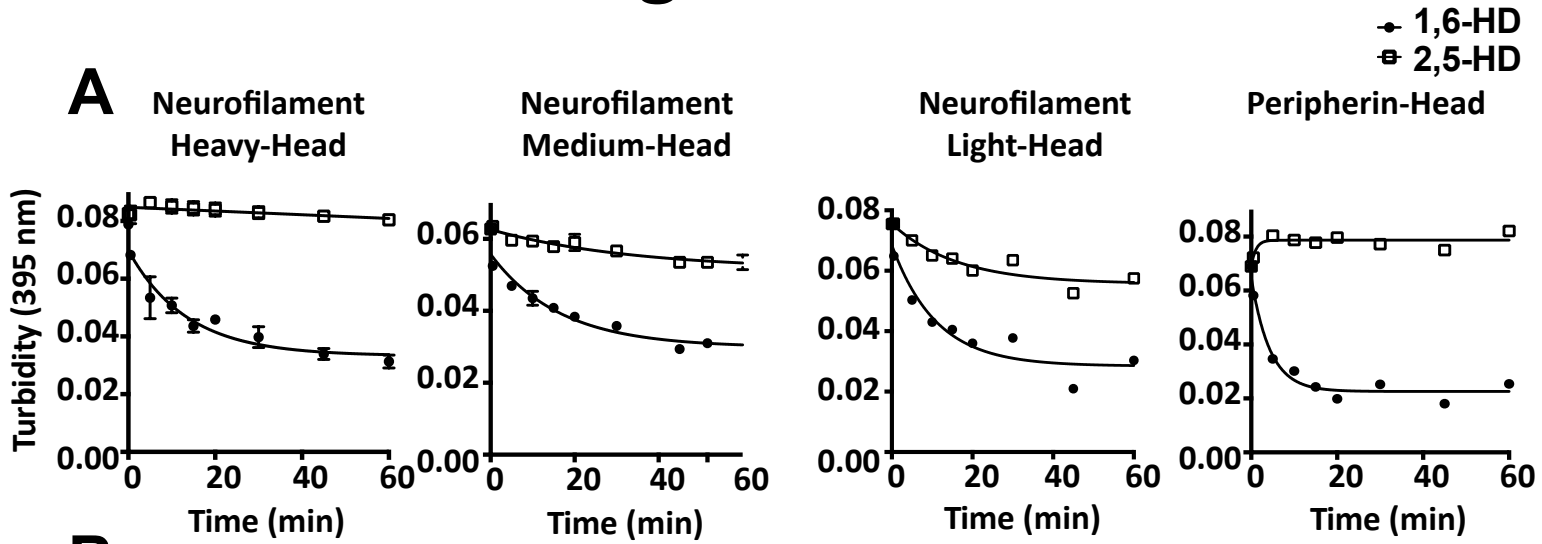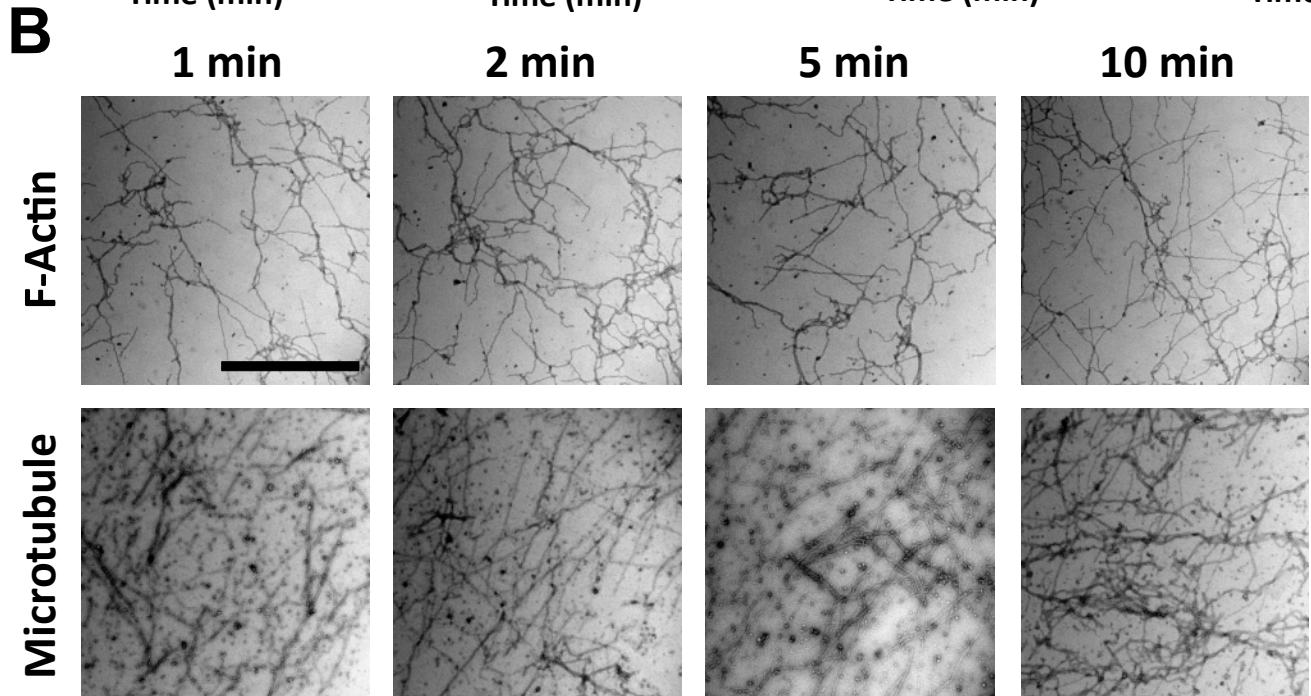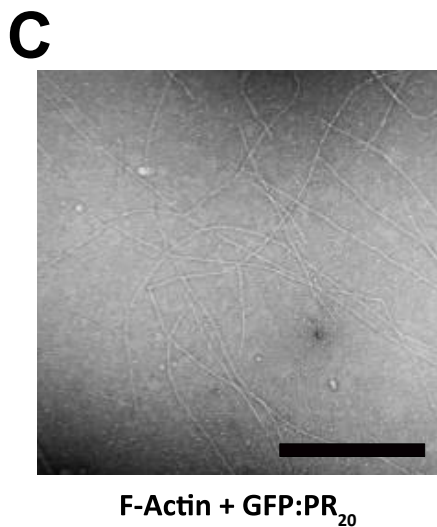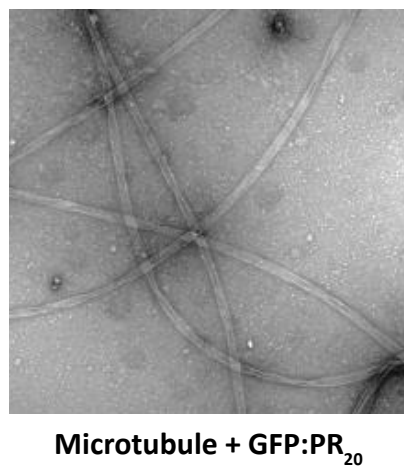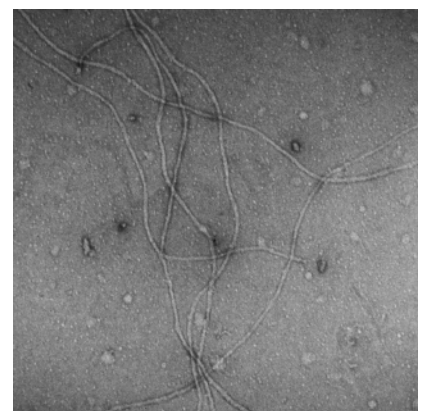

Supplement: NIHMS824256-supplement-3.pdf [file NIHMS824256-supplement-3.pdf]
