# Supplementary material
Source: PubMed Central journal article supplement (PMC5076566)
Supplement: NIHMS824256-supplement-7.pdf [file NIHMS824256-supplement-7.pdf]

**Table S4. Calculated hydrophobicity of aliphatic alcohols**

|        | VCCLab | ACD/Labs | EPISuite | ChemAxon |
|--------|--------|----------|----------|----------|
| 1,6-HD | 0.59   | -0.07    | 0.76     | 0.26     |
| 2,5-HD | 0.31   | -0.33    | 0.62     | 0.20     |
| 1,5-PD | -0.10  | -0.60    | 0.27     | -0.19    |
| 1,4-BD | -0.63  | -1.02    | -0.22    | -0.63    |

Hydrophobicity was calculated with 4 different algorithms (see Experimental Methods). More positive numbers indicate higher hydrophobicity in all the algorithms.
